# Supplementary material for: In situ observations of greenhouse gases over Europe during the CoMet 1.0 campaign aboard the HALO aircraft
Source: Copernicus journal article supplement (doi:10.5194/amt-2020-287), 2020-08-17
Supplement: Supplementary file 1 [file amt-2020-287-supplement.pdf]

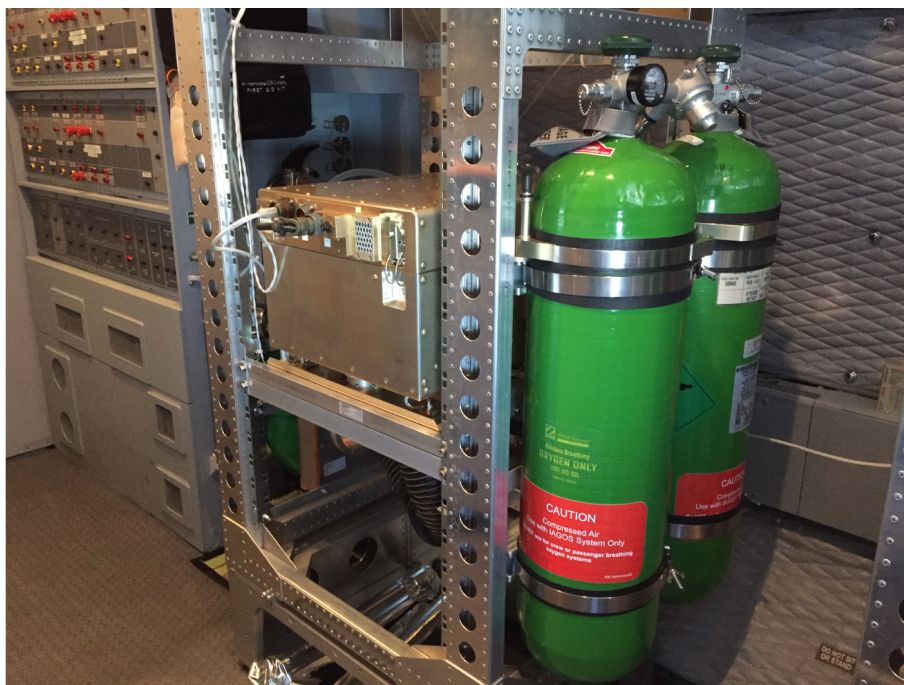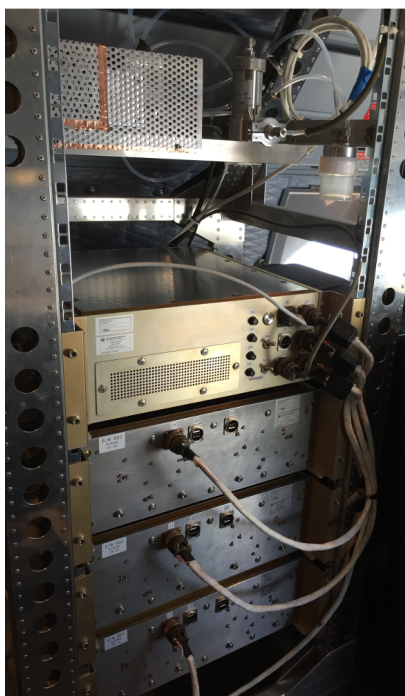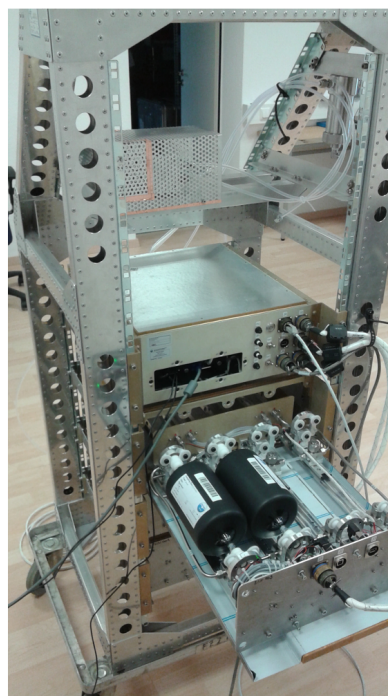

**Figure S1.** Top: Jena Instrument for Greenhouse gases (JIG) installed onboard German research aircraft HALO. Bottom-left: Jena Air Sampler (JAS, bottom) aboard HALO. Bottom-right: JAS instrument in the lab before installation on the aircraft; also visible are two sample flasks used in the CoMet 1.0 campaign, mounted in the instrument.

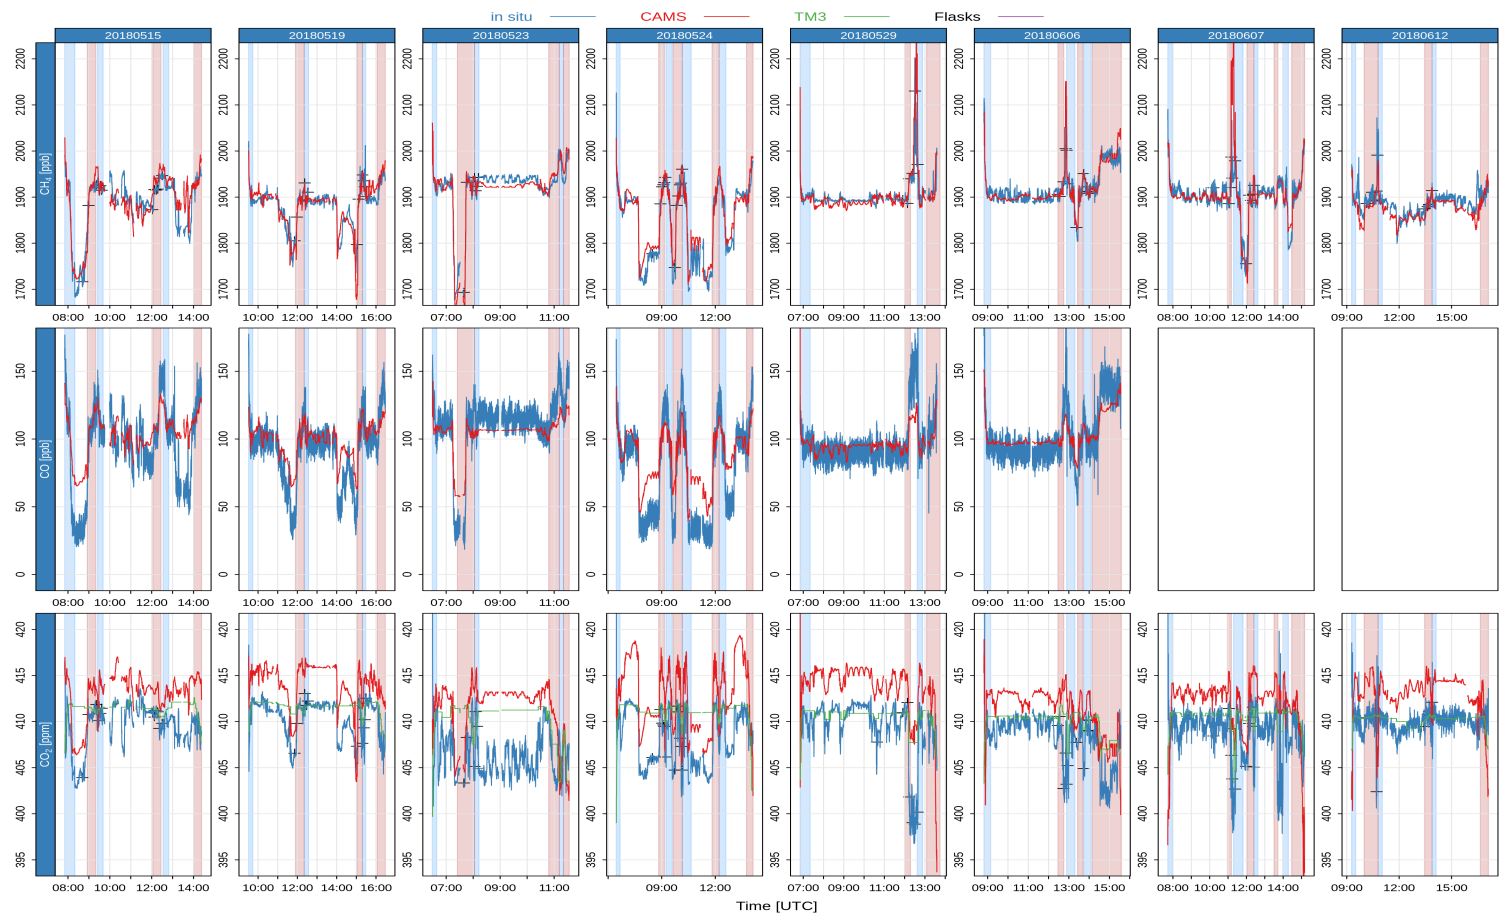

**Figure S2.** Time-plots of in situ measurements of CH<sub>4</sub>, CO and CO<sub>2</sub> performed throughout CoMet campaign aboard HALO aircraft with JIG instrument (blue). Model results from CAMS and TM3 extracted at respective time and aircraft coordinates are given in red and green, respectively. Results from flask samples collected with JAS marked with crosses. Shading denotes data flagged as "vertical profiles" and used for characterization of vertical structure of the atmosphere over the study area. Blue shading - ascending profile. Red shading - descending profile. CO data for flights on June 7th and June 12th discarded due to instrument malfunction. See the manuscript for details.

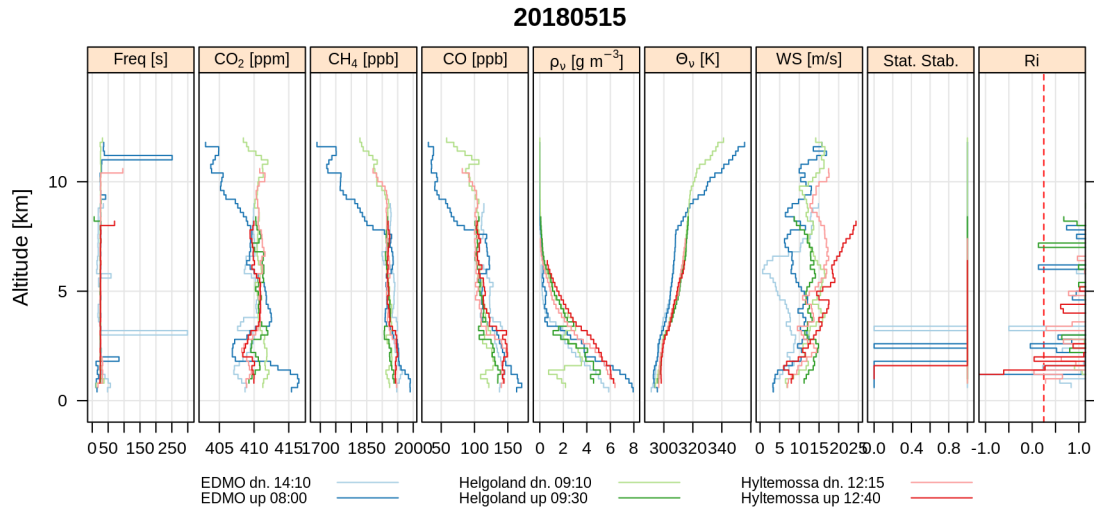

**Figure S3.** Detailed profile information - flight on May 15th, 2018. Data binned into layers 200 m thick layers, average per layer is plotted. WS - wind speed. Static stability (Stat. Stab.) and Richardson number (Ri) calculated according to Stull (2012). Locations and their abbreviations can be found in Table S1.

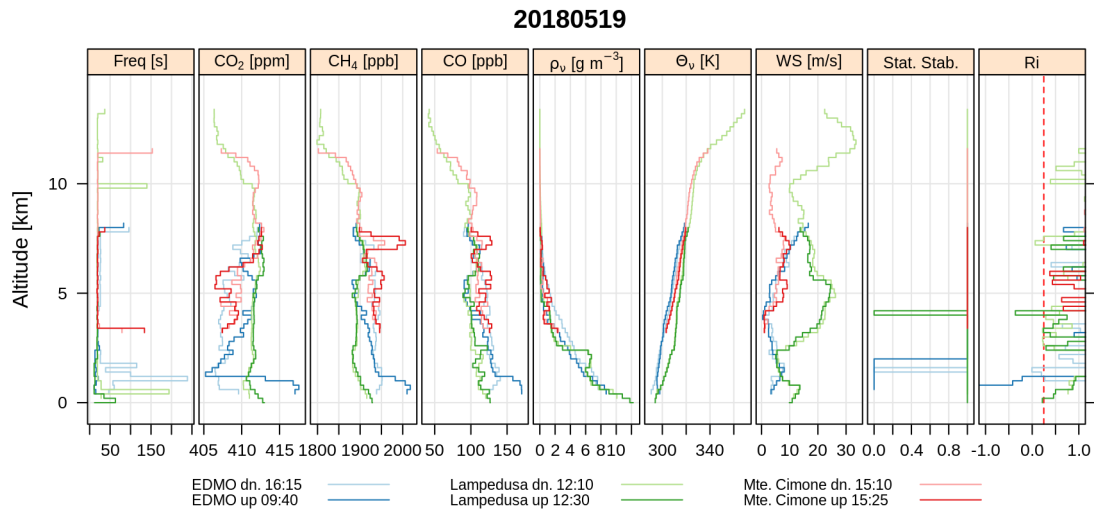

**Figure S4.** Detailed profile information - flight on May 19th, 2018. Data binned into layers 200 m thick layers, average per layer is plotted. WS - wind speed. Static stability (Stat. Stab.) and Richardson number (Ri) calculated according to Stull (2012). Locations and their abbreviations can be found in Table S1.

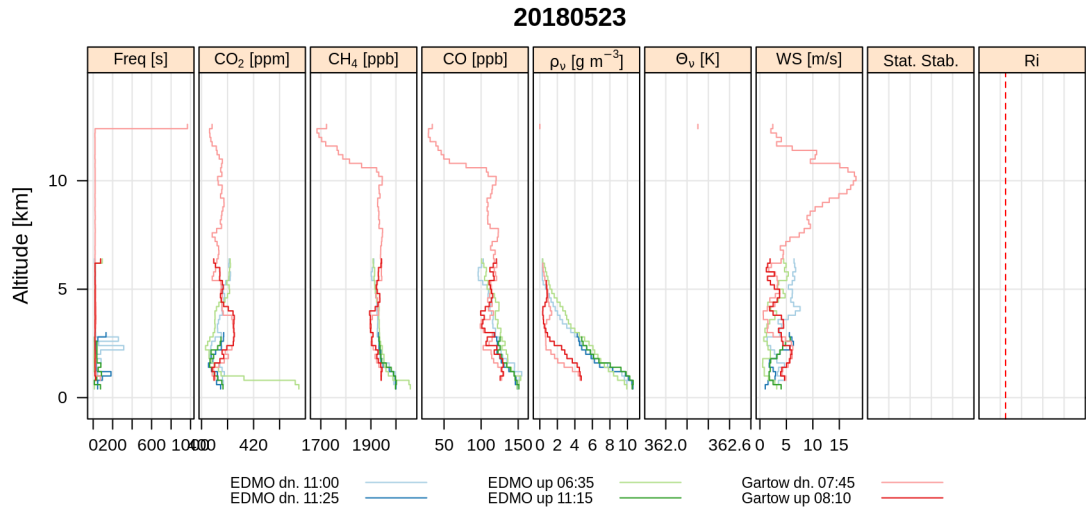

**Figure S5.** Detailed profile information - flight on May 23rd, 2018. Data binned into layers 200 m thick layers, average per layer is plotted. WS - wind speed. Static stability (Stat. Stab.) and Richardson number (Ri) calculated according to Stull (2012). Locations and their abbreviations can be found in Table S1.

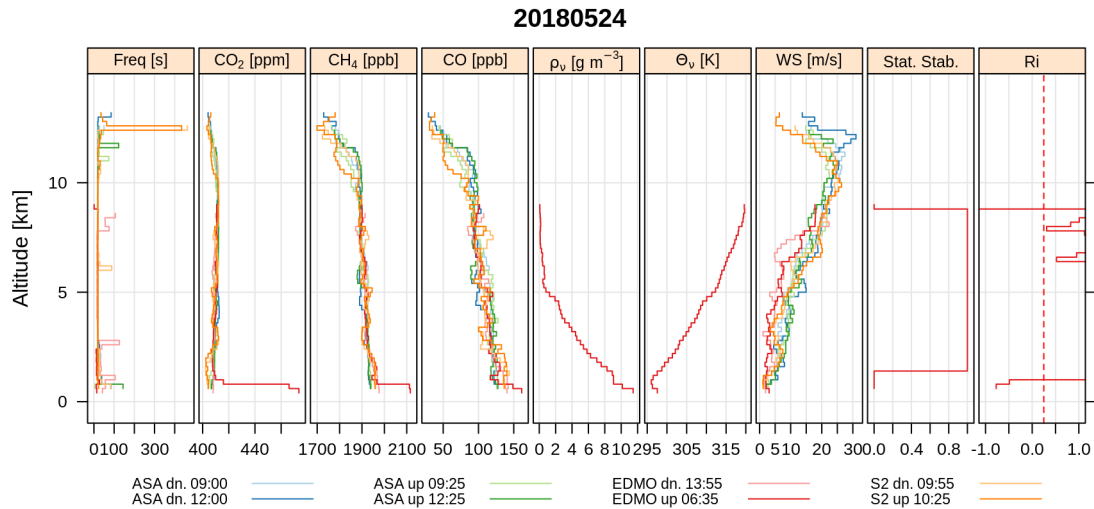

**Figure S6.** Detailed profile information - flight on May 24th, 2018. Data binned into layers 200 m thick layers, average per layer is plotted. WS - wind speed. Static stability (Stat. Stab.) and Richardson number (Ri) calculated according to Stull (2012). Locations and their abbreviations can be found in Table S1.

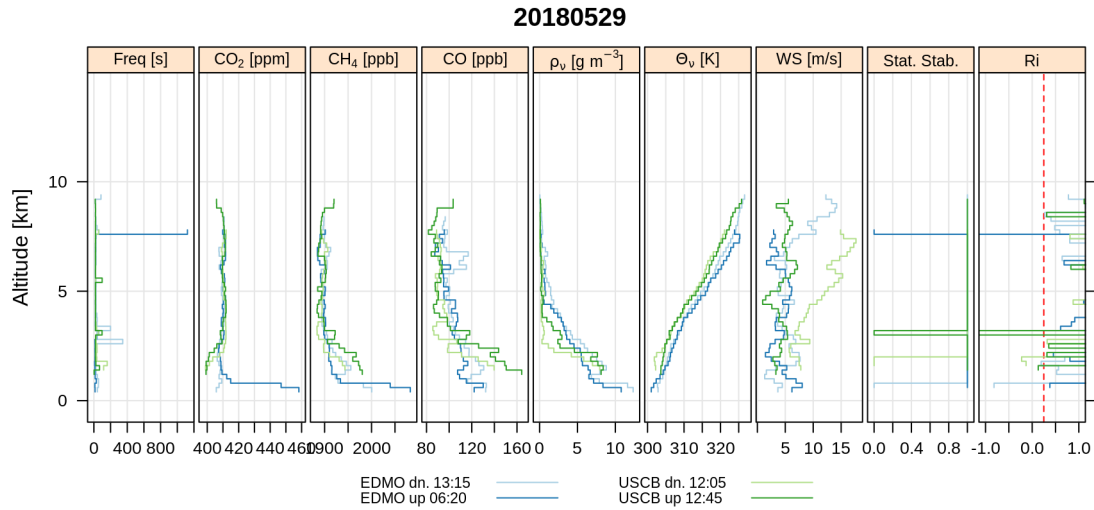

**Figure S7.** Detailed profile information - flight on May 29th, 2018. Data binned into layers 200 m thick layers, average per layer is plotted. WS - wind speed. Static stability (Stat. Stab.) and Richardson number (Ri) calculated according to Stull (2012). Locations and their abbreviations can be found in Table S1.

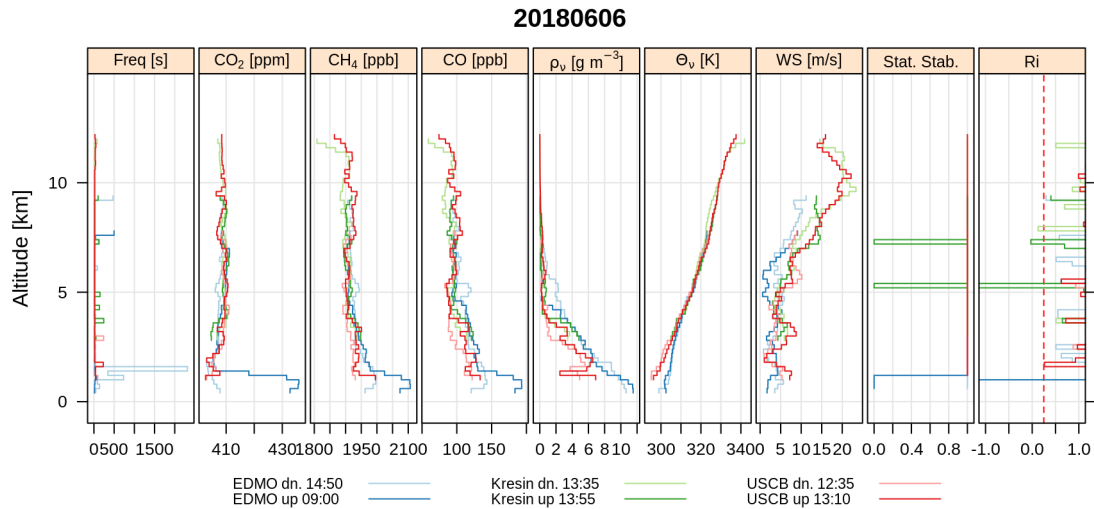

**Figure S8.** Detailed profile information - flight on June 6th, 2018. Data binned into layers 200 m thick layers, average per layer is plotted. WS - wind speed. Static stability (Stat. Stab.) and Richardson number (Ri) calculated according to Stull (2012). Locations and their abbreviations can be found in Table S1.

20180607

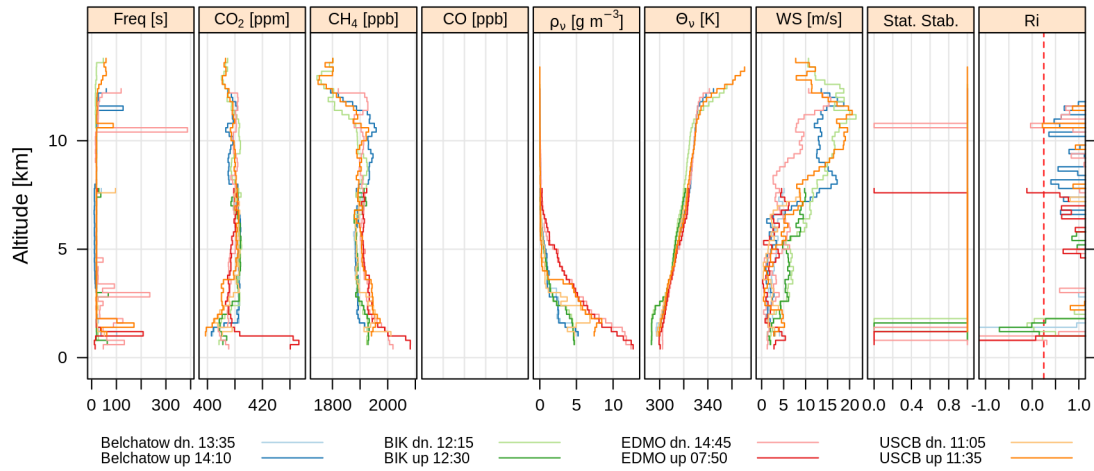

**Figure S9.** Detailed profile information - flight on June 7th, 2018. Data binned into layers 200 m thick layers, average per layer is plotted. WS - wind speed. Static stability (Stat. Stab.) and Richardson number (Ri) calculated according to Stull (2012). Locations and their abbreviations can be found in Table S1.

20180612

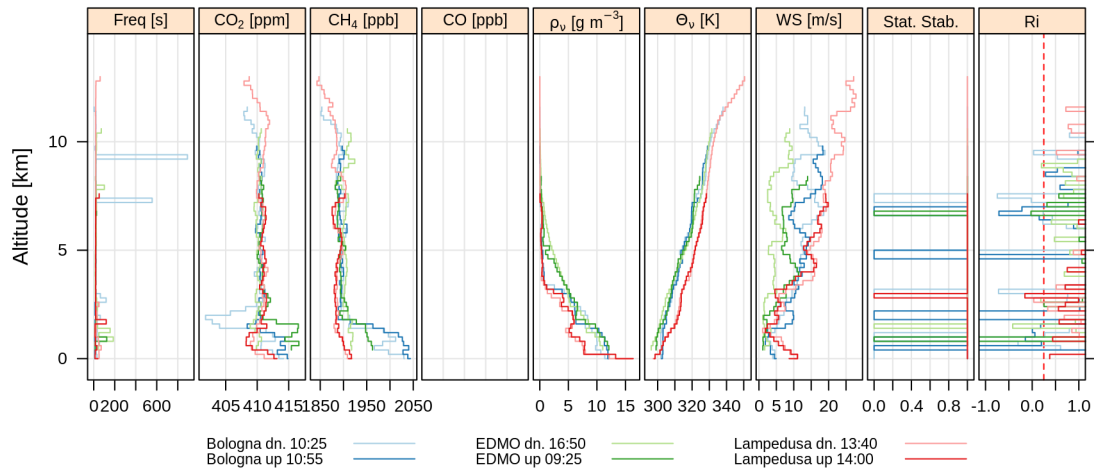

**Figure S10.** Detailed profile information - flight on June 12th, 2018. Data binned into layers 200 m thick layers, average per layer is plotted. WS - wind speed. Static stability (Stat. Stab.) and Richardson number (Ri) calculated according to Stull (2012). Locations and their abbreviations can be found in Table S1.

20180515

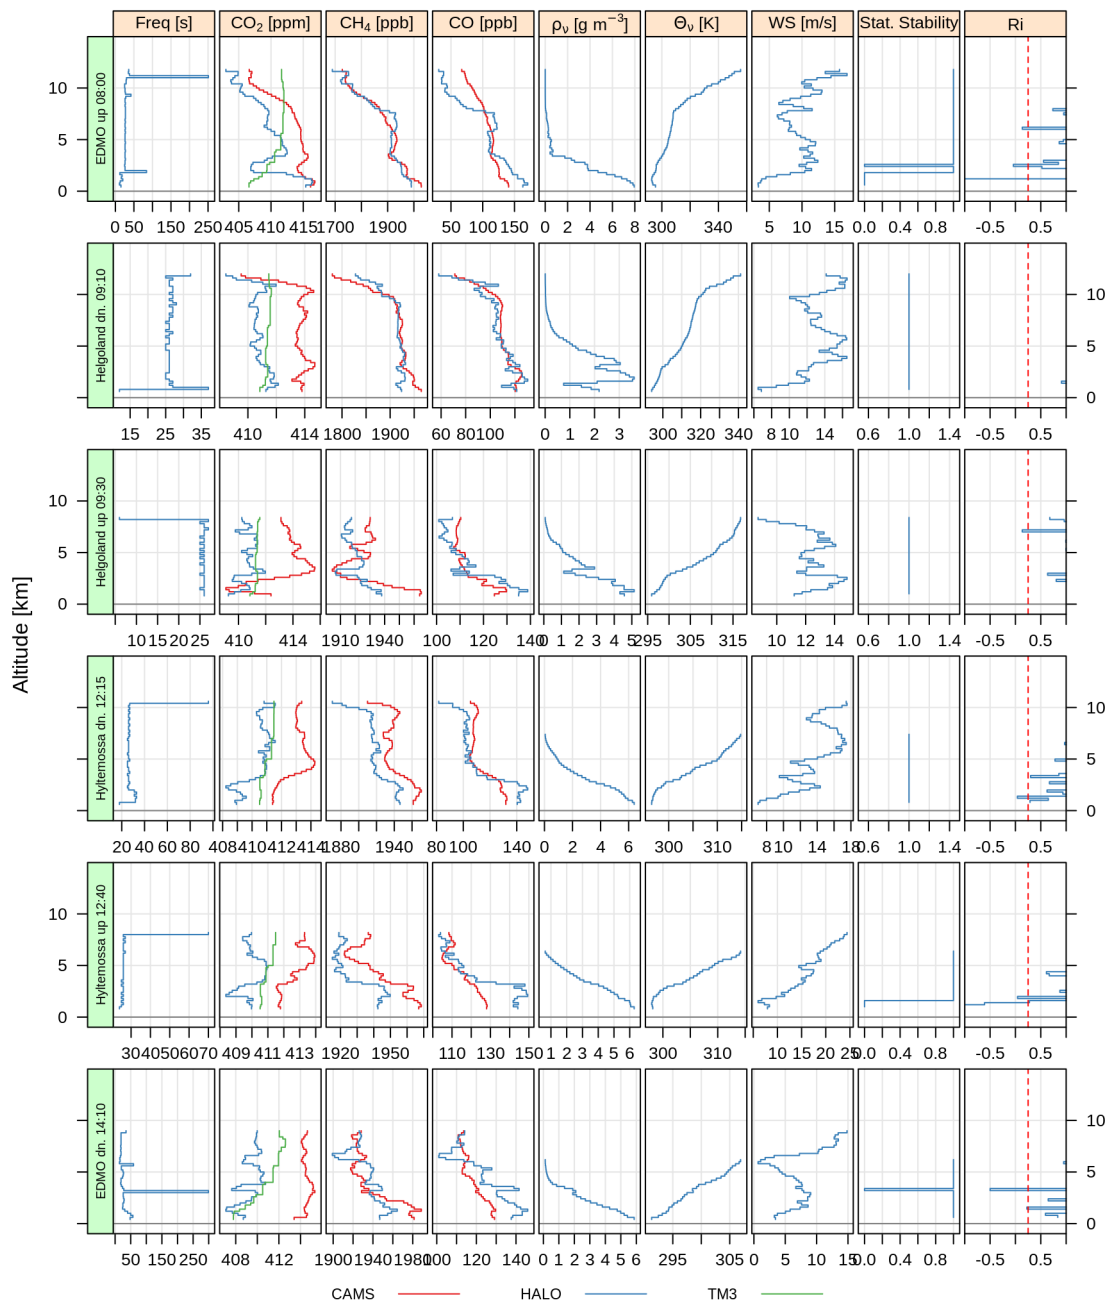

**Figure S11.** Detailed profile information - flight on May 15th, 2018. Data binned into layers 200 m thick layers, average per layer is plotted. WS - wind speed. Static stability (Stat. Stab.) and Richardson number (Ri) calculated according to Stull (2012). Modeling results from CAMS and TM3 provided for comparison. See main text for details. Locations and their abbreviations can be found in Table S1.

20180519

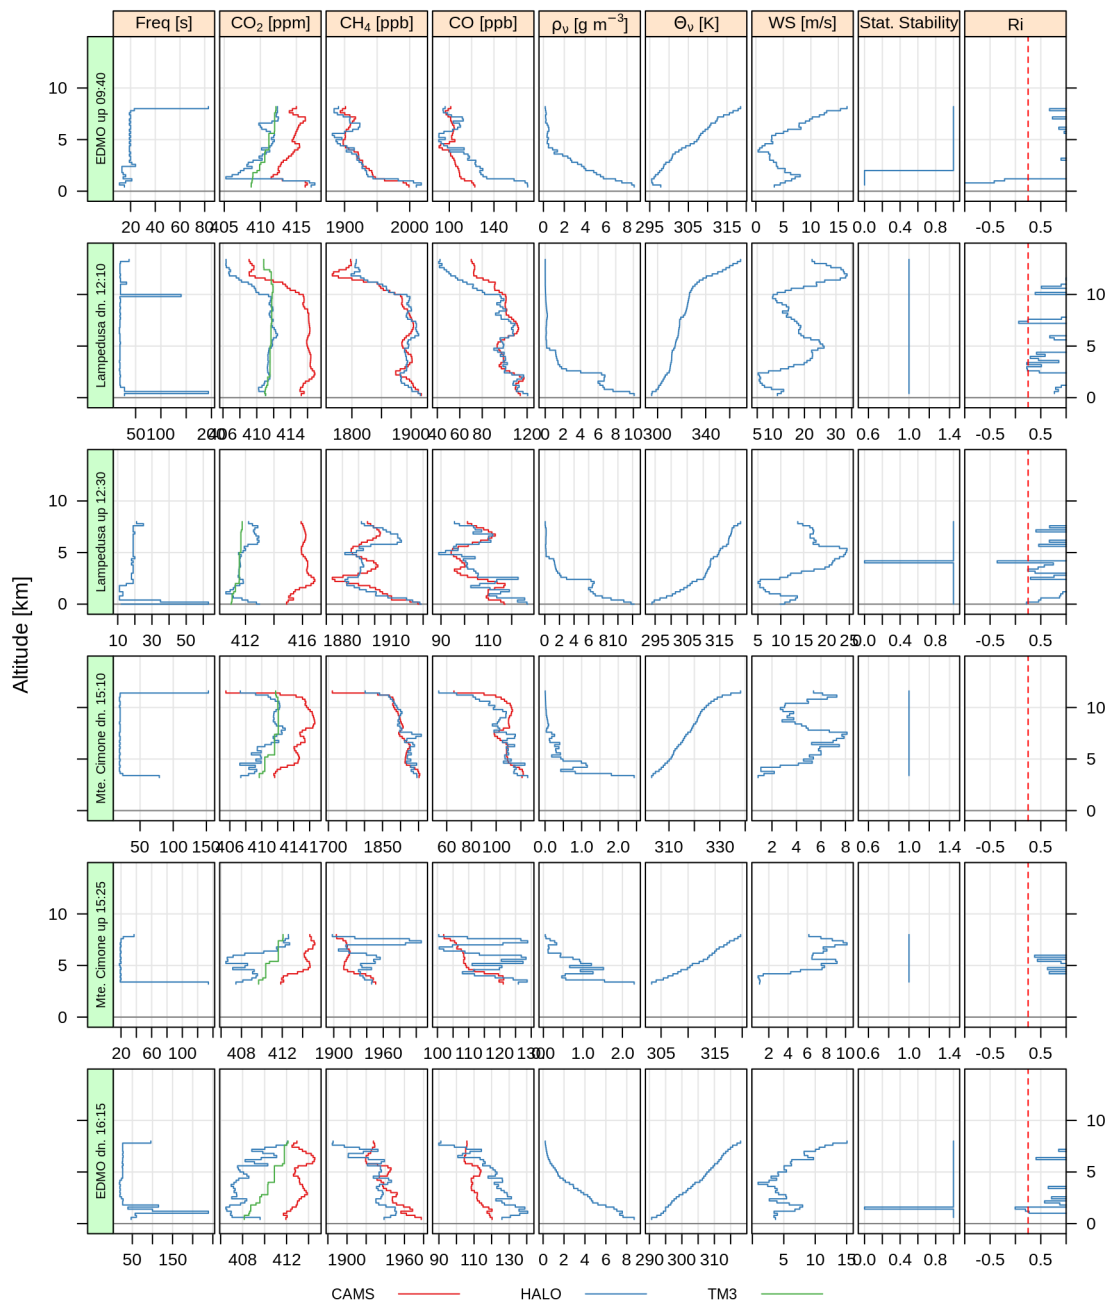

**Figure S12.** Detailed profile information - flight on May 19th, 2018. Data binned into layers 200 m thick layers, average per layer is plotted. WS - wind speed. Static stability (Stat. Stab.) and Richardson number (Ri) calculated according to Stull (2012). Modeling results from CAMS and TM3 provided for comparison. See main text for details. Locations and their abbreviations can be found in Table S1.



20180523

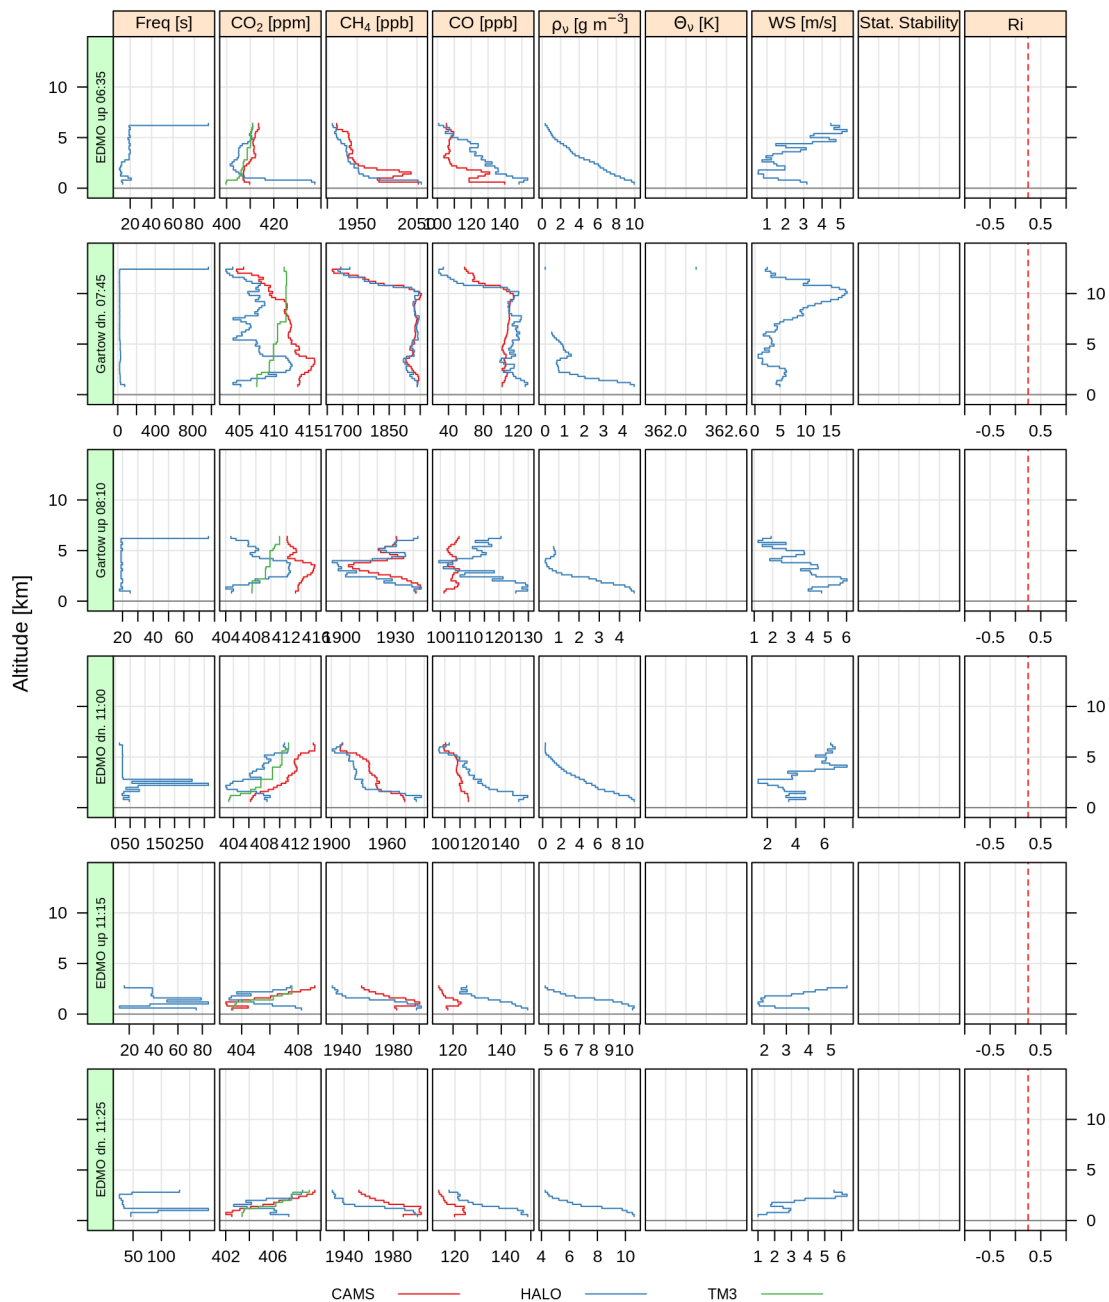

**Figure S13.** Detailed profile information - flight on May 23rd, 2018. Data binned into layers 200 m thick layers, average per layer is plotted. WS - wind speed. Static stability (Stat. Stab.) and Richardson number (Ri) calculated according to Stull (2012). Modeling results from CAMS and TM3 provided for comparison. See main text for details. Locations and their abbreviations can be found in Table S1.

20180524

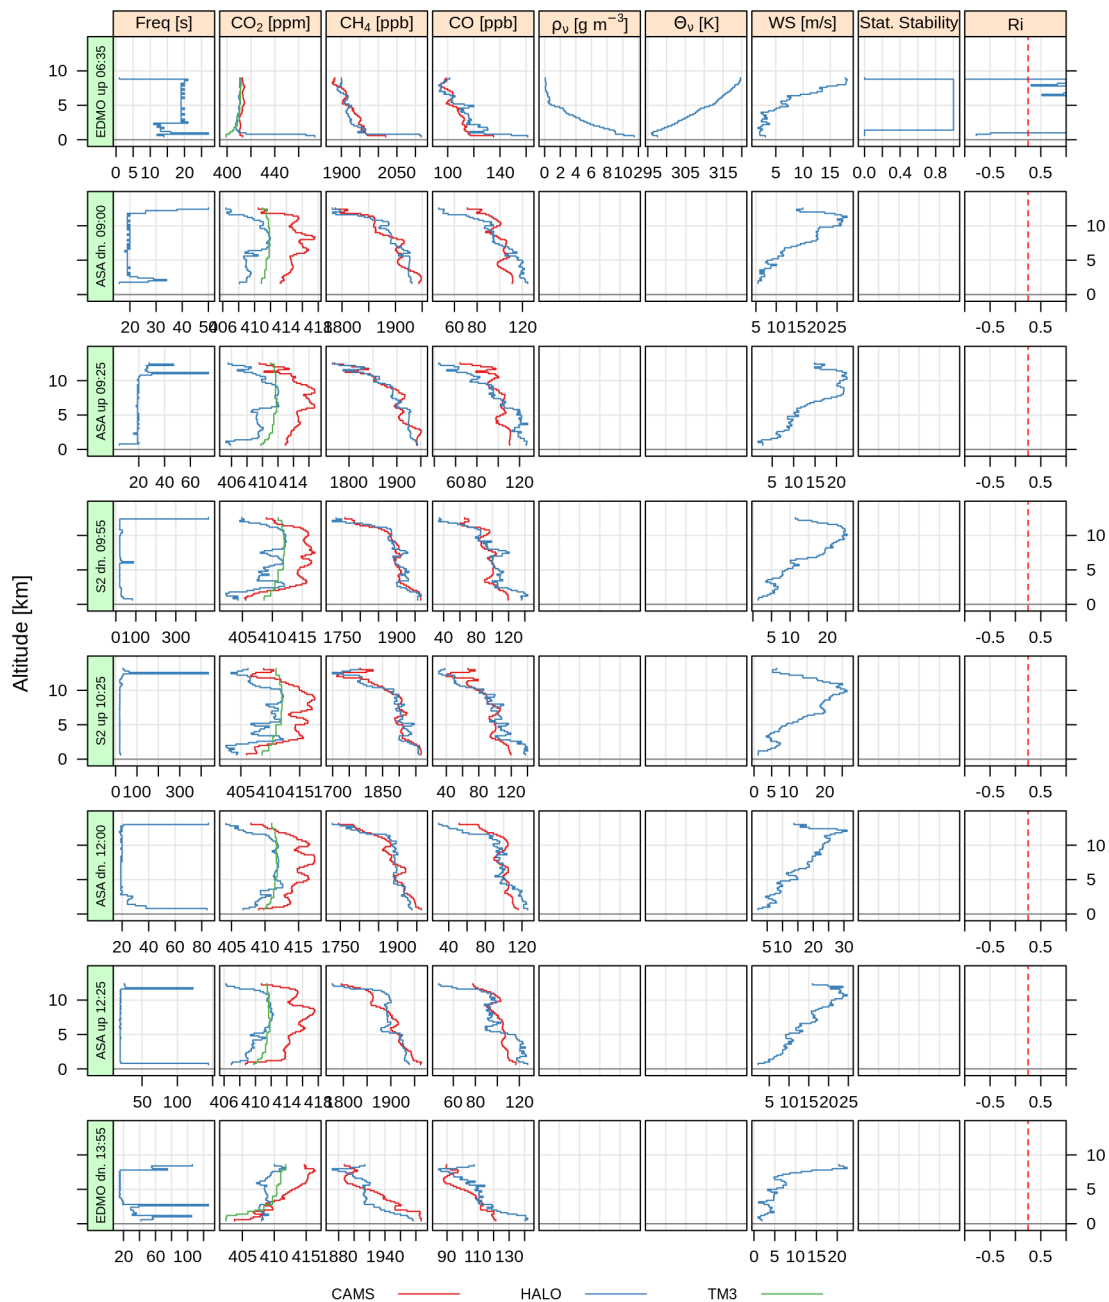

**Figure S14.** Detailed profile information - flight on May 24th, 2018. Data binned into layers 200 m thick layers, average per layer is plotted. WS - wind speed. Static stability (Stat. Stab.) and Richardson number (Ri) calculated according to Stull (2012). Modeling results from CAMS and TM3 provided for comparison. See main text for details. Locations and their abbreviations can be found in Table S1.

20180529

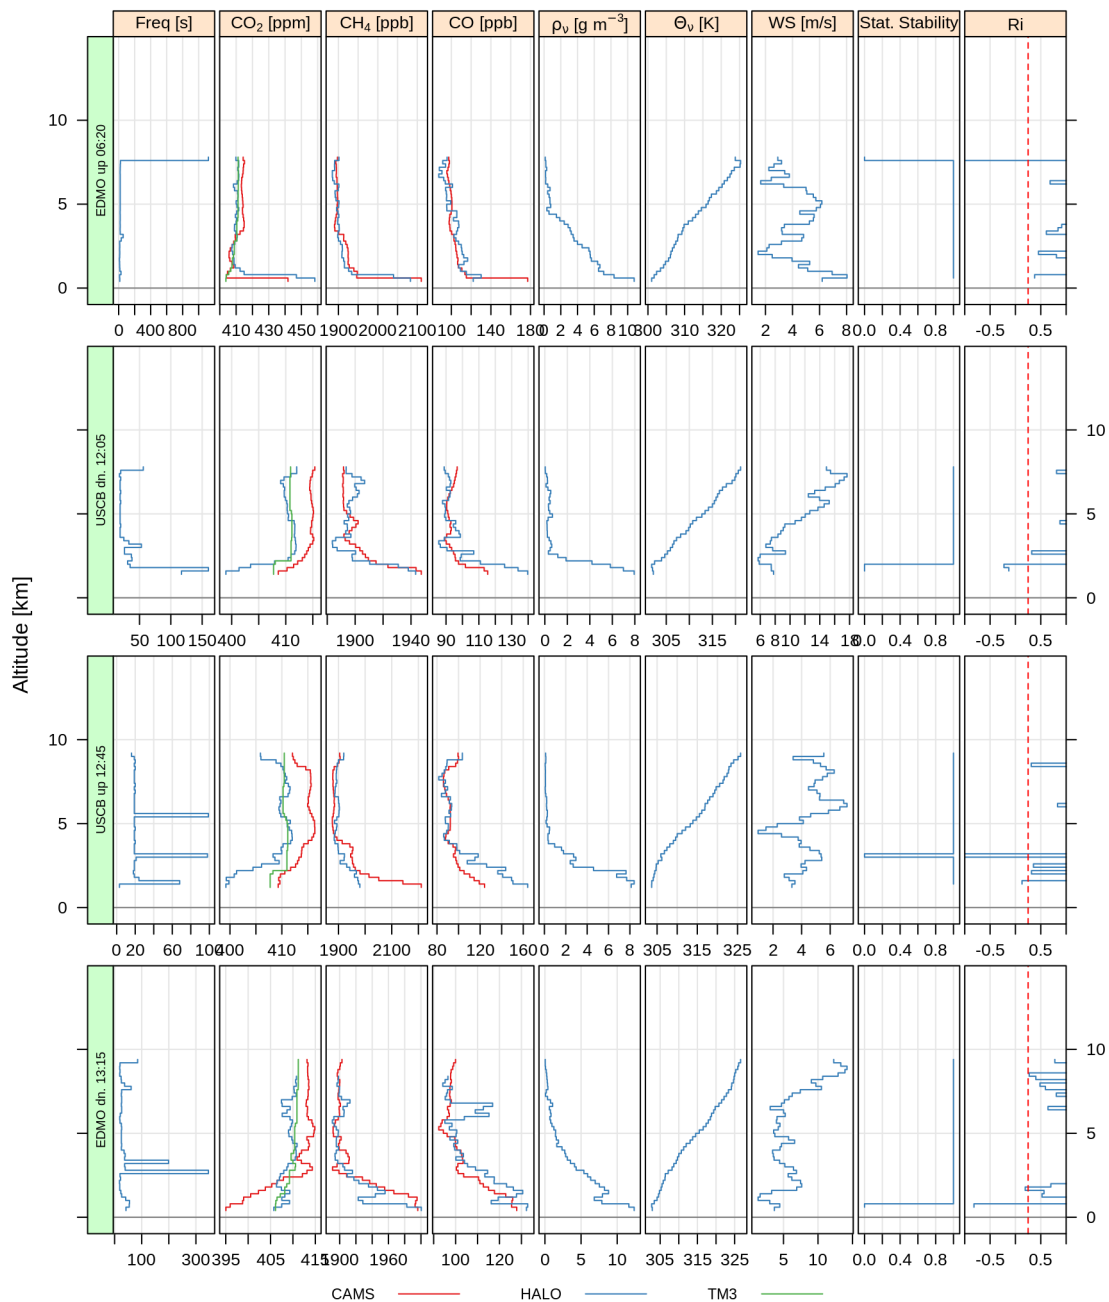

**Figure S15.** Detailed profile information - flight on May 29th, 2018. Data binned into layers 200 m thick layers, average per layer is plotted. WS - wind speed. Static stability (Stat. Stab.) and Richardson number (Ri) calculated according to Stull (2012). Modeling results from CAMS and TM3 provided for comparison. See main text for details. Locations and their abbreviations can be found in Table S1.

20180606

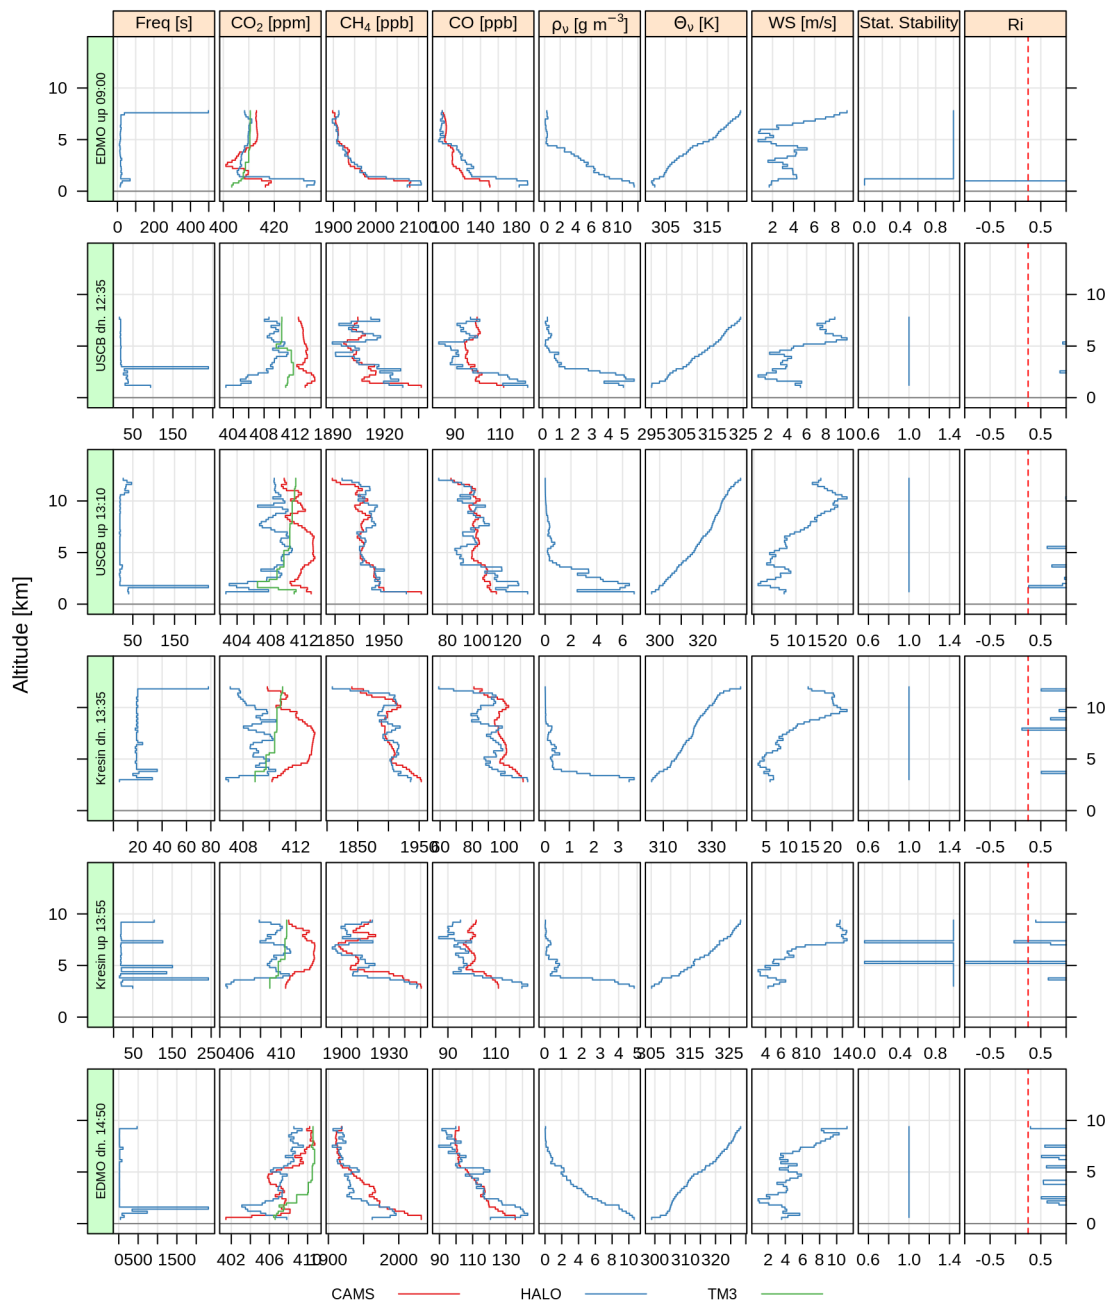

**Figure S16.** Detailed profile information - flight on June 6th, 2018. Data binned into layers 200 m thick layers, average per layer is plotted. WS - wind speed. Static stability (Stat. Stab.) and Richardson number (Ri) calculated according to Stull (2012). Modeling results from CAMS and TM3 provided for comparison. See main text for details. Locations and their abbreviations can be found in Table S1.

20180607

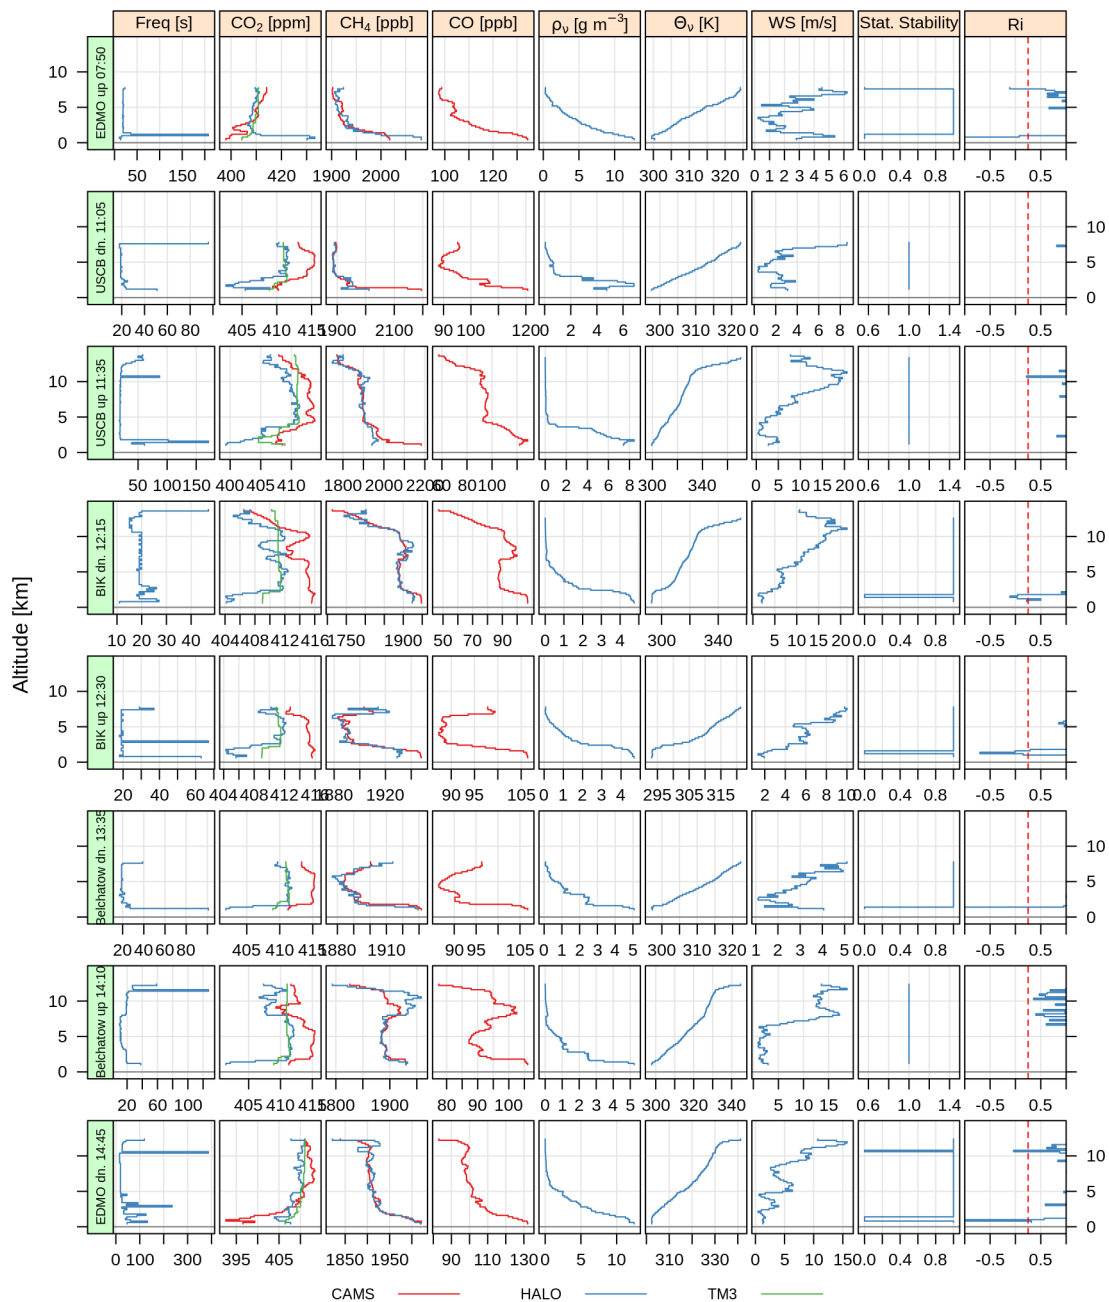

**Figure S17.** Detailed profile information - flight on June 7th, 2018. Data binned into layers 200 m thick layers, average per layer is plotted. WS - wind speed. Static stability (Stat. Stab.) and Richardson number (Ri) calculated according to Stull (2012). Modeling results from CAMS and TM3 provided for comparison. See main text for details. Locations and their abbreviations can be found in Table S1.

20180612

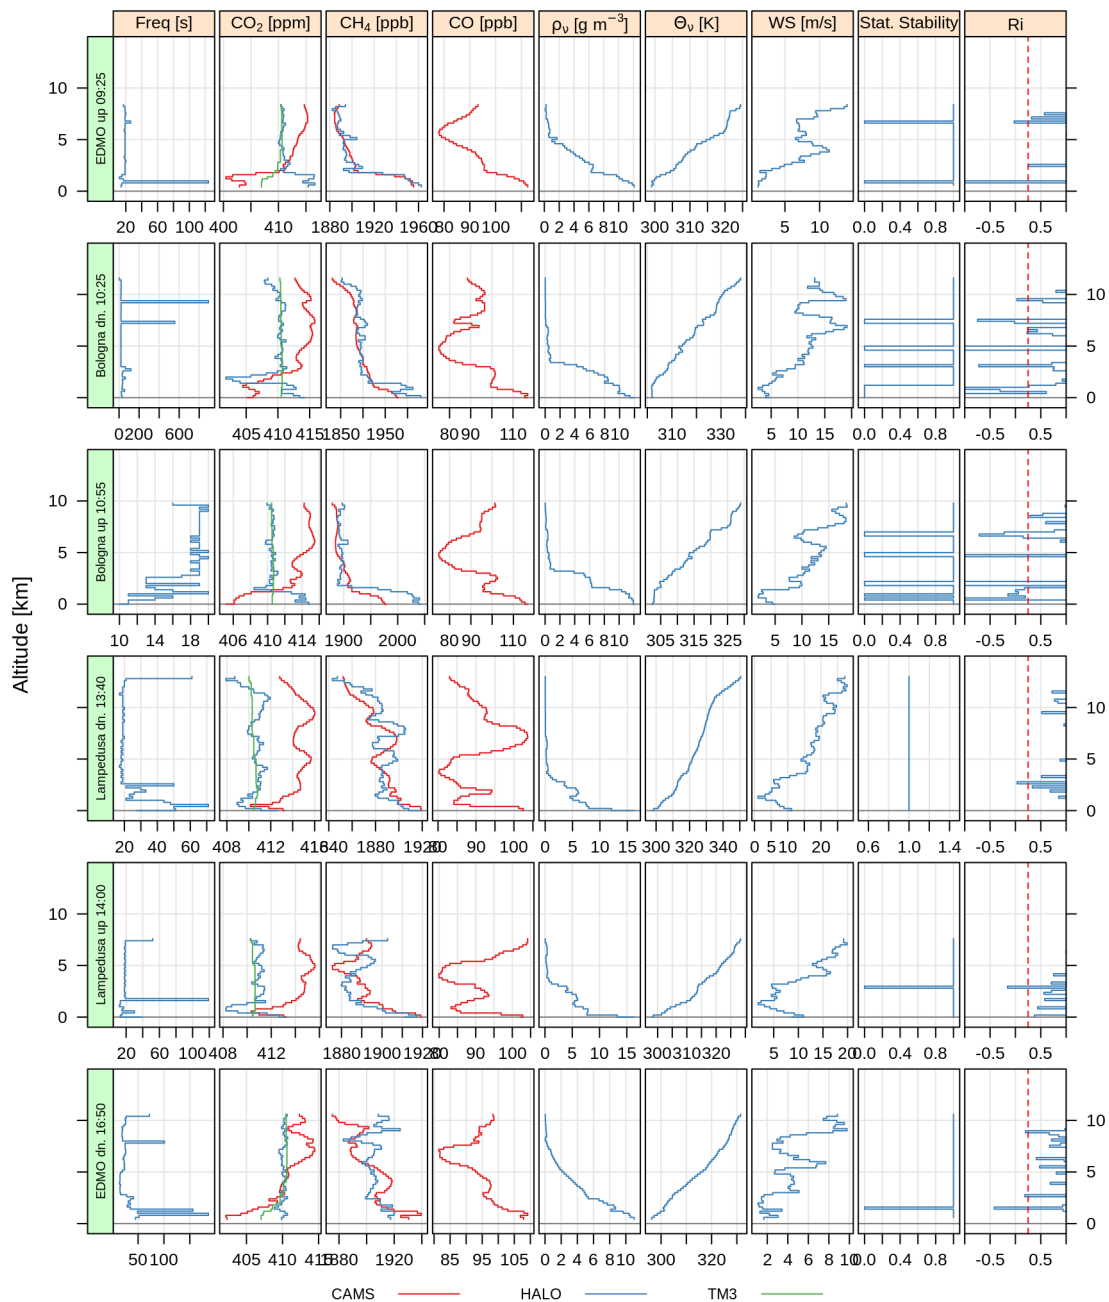

**Figure S18.** Detailed profile information - flight on June 12th, 2018. Data binned into layers 200 m thick layers, average per layer is plotted. WS - wind speed. Static stability (Stat. Stab.) and Richardson number (Ri) calculated according to Stull (2012). Modeling results from CAMS and TM3 provided for comparison. See main text for details. Locations and their abbreviations can be found in Table S1.

CoMet 1.0 Flask locations

May - June 2018

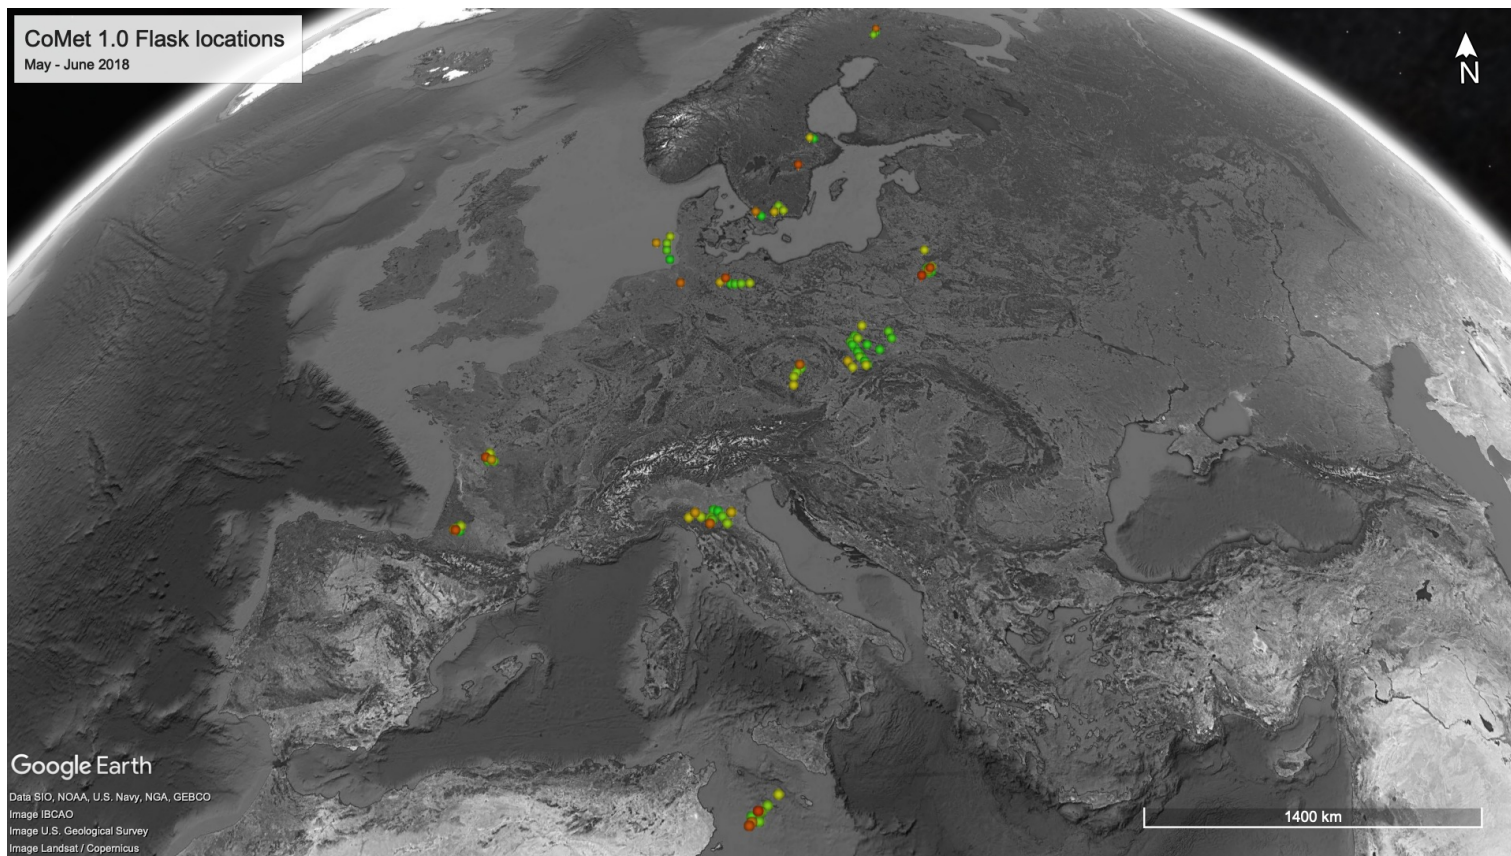

15

**Figure S19.** Overview of locations from which flasks were collected with JAS instrument aboard HALO during CoMet 1.0 campaign. Colours mark the average height from which the air was sampled, going from low (green) to high (red) altitudes. Image source: Google Earth v.7.3.2.5776, SIO, NOAA, U.S. Navy, NGA, GEBCO, IBCAO, U.S. Geological Survey, Landsat / Copernicus.

**Table S1:** Detailed information on vertical profiles sounded for with HALO during the CoMet campaign. Latitudes and longitudes coordinates calculated as an average throughout the profile. Number of flasks is given collectively for ascending and descending profiles.

| Date       | Time UTC      | Dir. | Name        | Location |          | Altitude |         | CH <sub>4</sub> | In situ |                 | Flasks | Notes             |
|------------|---------------|------|-------------|----------|----------|----------|---------|-----------------|---------|-----------------|--------|-------------------|
|            |               |      |             | Lat      | Lon      | Bottom   | Top     |                 | CO      | CO <sub>2</sub> |        |                   |
| 2018-05-15 | 07:50 - 08:20 | up   | EDMO        | 48.867 N | 11.126 E | 0.6 km   | 12 km   | ✓               | ✓       | ✓               | 0      | Home base         |
|            | 08:55 - 09:20 | down | Helgoland   | 54.307 N | 7.677 E  | 0.8 km   | 12.2 km | ✓               | ✓       | ✓               | 6      | ICOS tt.          |
|            | 09:24 - 09:40 | up   | Helgoland   | 54.79 N  | 7.761 E  | 1 km     | 8.6 km  | ✓               | ✓       | ✓               | "      | "                 |
|            | 12:03 - 12:26 | down | Hyltemossa  | 56.241 N | 14.405 E | 0.8 km   | 10.8 km | ✓               | ✓       | ✓               | 6      | ICOS tt.          |
|            | 12:32 - 12:49 | up   | Hyltemossa  | 55.517 N | 13.697 E | 1 km     | 8.4 km  | ✓               | ✓       | ✓               | "      | "                 |
|            | 14:00 - 14:22 | down | EDMO        | 48.934 N | 12.046 E | 0.6 km   | 9.2 km  | ✓               | ✓       | ✓               | 0      | Home base         |
| 2018-05-19 | 09:30 - 09:44 | up   | EDMO        | 47.836 N | 11.095 E | 0.6 km   | 8.4 km  | ✓               | ✓       | ✓               | 0      | Home base         |
|            | 11:54 - 12:21 | down | Lampedusa   | 35.536 N | 12.78 E  | 0.4 km   | 13.6 km | ✓               | ✓       | ✓               | 6      | ICOS cs.          |
|            | 12:21 - 12:34 | up   | Lampedusa   | 35.766 N | 12.966 E | 0 km     | 8.2 km  | ✓               | ✓       | ✓               | "      | "                 |
|            | 15:02 - 15:19 | down | Mte. Cimone | 44.511 N | 10.402 E | 3.4 km   | 11.8 km | ✓               | ✓       | ✓               | 6      | ICOS mtn.         |
|            | 15:19 - 15:29 | up   | Mte. Cimone | 44.351 N | 10.552 E | 3.4 km   | 8.2 km  | ✓               | ✓       | ✓               | "      | "                 |
|            | 16:04 - 16:28 | down | EDMO        | 47.565 N | 11.274 E | 0.6 km   | 8.2 km  | ✓               | ✓       | ✓               | 0      | Home base         |
| 2018-05-23 | 06:29 - 06:39 | up   | EDMO        | 48.156 N | 11.284 E | 0.6 km   | 6.6 km  | ✓               | ✓       | ✓               | 0      | Home base         |
|            | 07:25 - 08:03 | down | Gartow      | 53.03 N  | 11.245 E | 1 km     | 12.8 km | ✓               | ✓       | ✓               | 6      | ICOS tt.          |
|            | 08:03 - 08:13 | up   | Gartow      | 52.986 N | 12.1 E   | 1 km     | 6.6 km  | ✓               | ✓       | ✓               | "      | "                 |
|            | 10:48 - 11:11 | down | EDMO        | 48.844 N | 12.09 E  | 0.8 km   | 6.6 km  | ✓               | ✓       | ✓               | 6      | Home base         |
|            | 11:11 - 11:20 | up   | EDMO        | 47.905 N | 11.277 E | 0.6 km   | 3 km    | ✓               | ✓       | ✓               | "      | "                 |
|            | 11:20 - 11:33 | down | EDMO        | 47.872 N | 11.287 E | 0.6 km   | 3.2 km  | ✓               | ✓       | ✓               | "      | "                 |
| 2018-05-24 | 06:27 - 06:40 | up   | EDMO        | 47.784 N | 10.912 E | 0.6 km   | 9.2 km  | ✓               | ✓       | ✓               | 0      | Home base         |
|            | 08:50 - 09:09 | down | ASA         | 43.711 N | -0.249 E | 1.8 km   | 12.8 km | ✓               | ✓       | ✓               | 6      | ICOS tt.          |
|            | 09:14 - 09:35 | up   | ASA         | 44.005 N | -0.182 E | 0.8 km   | 12.8 km | ✓               | ✓       | ✓               | "      | "                 |
|            | 09:38 - 10:09 | down | S2          | 46.137 N | 0.546 E  | 0.8 km   | 12.8 km | ✓               | ✓       | ✓               | 6      | ICOS tt., Aircore |
|            | 10:09 - 10:39 | up   | S2          | 46.476 N | 0.753 E  | 0.8 km   | 13.4 km | ✓               | ✓       | ✓               | "      | "                 |
|            | 11:49 - 12:13 | down | ASA         | 43.694 N | -0.225 E | 0.8 km   | 13.4 km | ✓               | ✓       | ✓               | 0      | ICOS tt.          |
|            | 12:13 - 12:36 | up   | ASA         | 43.803 N | 0.907 E  | 0.8 km   | 12.6 km | ✓               | ✓       | ✓               | "      | "                 |
|            | 13:45 - 14:06 | down | EDMO        | 47.614 N | 11.308 E | 0.6 km   | 8.8 km  | ✓               | ✓       | ✓               | 0      | Home base         |
| 2018-05-29 | 06:50 - 07:20 | up   | EDMO        | 48.186 N | 11.641 E | 0.6 km   | 8 km    | ✓               | ✓       | ✓               | 0      | Home base         |
|            | 12:00 - 12:17 | down | USCB        | 50.965 N | 19.728 E | 1.6 km   | 8 km    | ✓               | ✓       | ✓               | 6      | Plume hunting     |
|            | 12:37 - 12:53 | up   | USCB        | 50.333 N | 17.502 E | 1.4 km   | 9.4 km  | ✓               | ✓       | ✓               | "      | "                 |
|            | 13:05 - 13:45 | down | EDMO        | 48.721 N | 12.943 E | 0.6 km   | 9.6 km  | ✓               | ✓       | ✓               | 0      | Home base         |

(continued)



(continued from previous page)

| Date          | Time UTC      | Dir. | Name      | Location |          | Altitude |         | CH <sub>4</sub> | In situ |                 | Flasks    | Notes         |
|---------------|---------------|------|-----------|----------|----------|----------|---------|-----------------|---------|-----------------|-----------|---------------|
|               |               |      |           | Lat      | Lon      | Bottom   | Top     |                 | CO      | CO <sub>2</sub> |           |               |
| 2018-06-06    | 08:48 - 09:08 | up   | EDMO      | 48.208 N | 11.902 E | 0.6 km   | 8 km    | ✓               | ✓       | ✓               | 0         | Home base     |
|               | 12:27 - 12:45 | down | USCB      | 49.896 N | 18.172 E | 1.2 km   | 8 km    | ✓               | ✓       | ✓               | 6         | Plume hunting |
|               | 12:53 - 13:18 | up   | USCB      | 49.475 N | 17.648 E | 1.2 km   | 12.4 km | ✓               | ✓       | ✓               | "         | "             |
|               | 13:26 - 13:42 | down | Kresin    | 49.552 N | 15.112 E | 3 km     | 12.2 km | ✓               | ✓       | ✓               | 6         | ICOS tt.      |
|               | 13:44 - 14:06 | up   | Kresin    | 49.152 N | 14.865 E | 3 km     | 9.6 km  | ✓               | ✓       | ✓               | "         | "             |
|               | 14:09 - 15:35 | down | EDMO      | 48.019 N | 12.102 E | 0.6 km   | 9.6 km  | ✓               | ✓       | ✓               | 0         | Home base     |
| 2018-06-07    | 07:43 - 07:58 | up   | EDMO      | 48.21 N  | 12.145 E | 0.6 km   | 8 km    | ✓               | X       | ✓               | 0         | Home base     |
|               | 10:58 - 11:11 | down | USCB      | 50.503 N | 18.115 E | 1.2 km   | 8 km    | ✓               | X       | ✓               | 6         | Plume hunting |
|               | 11:18 - 11:49 | up   | USCB      | 50.362 N | 19.415 E | 1.2 km   | 14 km   | ✓               | X       | ✓               | "         | "             |
|               | 12:03 - 12:24 | down | Białystok | 53.227 N | 23.093 E | 0.8 km   | 14 km   | ✓               | X       | ✓               | 6         | MPI tt.       |
|               | 12:24 - 12:38 | up   | Białystok | 53.131 N | 22.854 E | 0.8 km   | 8 km    | ✓               | X       | ✓               | "         | "             |
|               | 13:30 - 13:43 | down | Bełchatów | 50.886 N | 19.138 E | 1.2 km   | 8 km    | ✓               | X       | ✓               | 0         | Power plant   |
|               | 13:58 - 14:17 | up   | Bełchatów | 50.419 N | 18.384 E | 1.2 km   | 12.6 km | ✓               | X       | ✓               | "         | "             |
| 14:28 - 15:10 | down          | EDMO | 48.281 N  | 13.075 E | 0.6 km   | 12.6 km  | ✓       | X               | ✓       | 0               | Home base |               |
| 2018-06-12    | 09:16 - 09:30 | up   | EDMO      | 47.836 N | 10.892 E | 0.6 km   | 8.6 km  | ✓               | X       | ✓               | 0         | Home base     |
|               | 09:59 - 10:47 | down | Bologna   | 44.453 N | 11.484 E | 0 km     | 11.8 km | ✓               | X       | ✓               | 6         | airport m.a.  |
|               | 10:47 - 11:02 | up   | Bologna   | 44.154 N | 11.51 E  | 0 km     | 10 km   | ✓               | X       | ✓               | "         | "             |
|               | 13:27 - 13:53 | down | Lampedusa | 35.467 N | 12.628 E | 0 km     | 13.2 km | ✓               | X       | ✓               | 6         | ICOS cs.      |
|               | 13:53 - 14:07 | up   | Lampedusa | 35.812 N | 13.06 E  | 0 km     | 7.8 km  | ✓               | X       | ✓               | "         | "             |
|               | 16:39 - 17:06 | down | EDMO      | 47.373 N | 11.324 E | 0.6 km   | 10.8 km | ✓               | X       | ✓               | 0         | Home base     |

Abbreviations: ICOS - Integrated Carbon Observation System; MPI - Max Planck Institute; cs. - coastal site; mtn. - mountain station; tt. - tall tower; EDMO - Oberpfaffenhofen, Germany (HALO home base); ASA - Aire-sur-l'Adour; S2 - Aircore release site; USCB - Upper Silesian Coal Basin

## References

Stull, R. B.: An introduction to boundary layer meteorology, vol. 13, Springer Science & Business Media, 2012.
